# Supplementary material
Source: publisher figshare collection journal article supplement (https://acs.figshare.com/ndownloader/files/5856051)
Supplement: Supplementary file 1 [file 5856051]

## Sheet: Summary Table
Supplementary Table 1. Summary Table
Column1	Biological Replicate 1	Biological Replicate 2	Total unique
Mono-methylation	38	25	55
Di-methylation	46	44	74
Mutipli mono-methylated/dimethylated	10	12	20
Predicted mono-methylated binders	29 (76%)	22 (88%)	42 (76%)
Predicted di-methylated binders	36 (78%)	43 (98%)	64 (86%)
Source proteins (di)methylated binders	67	49	105
Previously identified mono-methylated sites*	11	3	13
Previously identified di-methylated sites*	10	10	18
* Arginine (di)methylatation sites reported in phosphosite.org database (2156 entries)

## Sheet: Methylated HLA Biol Repl1
Supplementary Table 1. List of mono-methylated peptides identified in Biological Replicate 1.
Sequence	Length	Protein Group Accessions	Protein	Modifications	PTM position in protein	PhosphoSitePlus Match	HLA predicted allele	IC50
AAAARAAAL	9	Q96T25	Zinc finger protein ZIC 5	R5(Methyl)	123		HLA-B07	21
ALDLAKKRV	9	P40126	L-dopachrome tautomerase	R8(Methyl)	151		N/A
ALIEKSKRV	9	Q63HK3	Zinc finger protein with KRAB and SCAN domains 2	R8(Methyl)	692		N/A
APAARFNNSQF	11	Q99967	Cbp/p300-interacting transactivator 2 (MSG-related protein 1) (MRG-1) (P35srj)	R5(Methyl)	92		HLA-B07	18
APARPGPAA	9	Q04637	Eukaryotic translation initiation factor 4 gamma 1 (eIF-4-gamma 1) (eIF-4G 1) (eIF-4G1) (p220)	R4(Methyl)	73	Yes	HLA-B07	13
APNYRLKSL	9	Q9HBM6	Transcription initiation factor TFIID subunit 9B (Neuronal cell death-related protein 7) (DN-7) (Transcription initiation factor TFIID subunit 9-like) (Transcription-associated factor TAFII31L)	R5(Methyl)	128	Yes	HLA-B07	14
APRGQRPESAL	11	P28062	Proteasome subunit beta type-8 (EC 3.4.25.1) (Low molecular mass protein 7) (Macropain subunit C13) (Multicatalytic endopeptidase complex subunit C13) (Proteasome component C13) (Proteasome subunit beta-5i) (Really interesting new gene 10 protein)	R3(Methyl)	11		HLA-B07	7
APRGVPQIEVTF	12	P11142	Heat shock cognate 71 kDa protein (Heat shock 70 kDa protein 8)	R3(Methyl)	469	Yes	HLA-B07	18
APRIITGPAPVL	12	Q96PU8	Protein quaking (Hqk) (HqkI)	R3(Methyl)	227	Yes	HLA-B07	11
GFGRGGAESHTFK	13	P50238	Cysteine-rich protein 1 (CRP-1) (Cysteine-rich heart protein) (CRHP) (hCRHP) (Cysteine-rich intestinal protein) (CRIP)	R4(Methyl)	68	Yes	N/A
GRLKAEIAR	9	P12270	Heat shock cognate 71 kDa protein (Heat shock 70 kDa protein 8) (Lipopolysaccharide-associated protein 1) (LAP-1) (LPS-associated protein 1)	R2(Methyl)	1377		HLA-B27	204
KGFGRGGAESHTF	13	P50238	Cysteine-rich protein 1 (CRP-1) (Cysteine-rich heart protein) (CRHP) (hCRHP) (Cysteine-rich intestinal protein) (CRIP)	R5(Methyl)	68	Yes	N/A
KGFGRGGAESHTFK	14	P50238	Cysteine-rich protein 1 (CRP-1) (Cysteine-rich heart protein) (CRHP) (hCRHP) (Cysteine-rich intestinal protein) (CRIP)	R5(Methyl)	68	Yes	HLA-A03	36
LGGRAAASL	9	Q7Z5L9	Interferon regulatory factor 2-binding protein 2	R4(Methyl)	208		N/A
LPRGAGGL	8	Q9Y6L7	Tolloid-like protein 2	R3(Methyl)	21		HLA-B07	84
LPRGRKQLAL	10	O60759	Cytohesin-interacting protein	R3(Methyl)	54		HLA-B07	21
MPYGQPRPPIL	11	Q9BXP5	Serrate RNA effector molecule homolog	R7(Methyl)	802		HLA-B07	26
QREIEIMR	8	Q9NRP7	Serine/threonine-protein kinase 36	R2(Methyl)	50		N/A
QRPPRPPPR	9	Q5TBK1	NEDD4-binding protein 2-like 1	R2(Methyl)	24		N/A
RAGSPLPRS	9	Q9BQ50	Three prime repair exonuclease 2	R8(Methyl)	10		HLA-B07	14
RLAHGVRLK	9	Q14692	Ribosome biogenesis protein BMS1 homolog (Ribosome assembly protein BMS1 homolog)	R7(Methyl)	1142		HLA-A03	23
RPGAPPAAI	9	Q8NCW0	Kremen protein 2	R1(Methyl)	357		HLA-B07	14
RPPYNRAVSL	10	Q9Y6Q9	Nuclear receptor coactivator 3 (NCoA-3) (EC 2.3.1.48) (ACTR) (Amplified in breast cancer 1 protein) (AIB-1) (CBP-interacting protein) (pCIP) (Class E basic helix-loop-helix protein 42) (bHLHe42) (Receptor-associated coactivator 3) (RAC-3) (Steroid receptor coactivator protein 3) (SRC-3) (Thyroid hormone receptor activator molecule 1) (TRAM-1)	R1(Methyl)	849		HLA-B07	14
RPQKPSLEF	9	Q96AP0	Adrenocortical dysplasia protein homolog (POT1 and TIN2-interacting protein)	R1(Methyl)	450		HLA-B07	10
RPRGPPPPP	9	Q13435	Splicing factor 3B subunit 2 (Pre-mRNA-splicing factor SF3b 145 kDa subunit) (SF3b145) (SF3b150) (Spliceosome-associated protein 145) (SAP 145)	R3(Methyl)	247	Yes	HLA-B07	40
RPRTNTPKQL	10	Q9Y6Q9	Nuclear receptor coactivator 3 (NCoA-3) (EC 2.3.1.48) (ACTR) (Amplified in breast cancer 1 protein) (AIB-1) (CBP-interacting protein) (pCIP) (Class E basic helix-loop-helix protein 42) (bHLHe42) (Receptor-associated coactivator 3) (RAC-3) (Steroid receptor coactivator protein 3) (SRC-3) (Thyroid hormone receptor activator molecule 1) (TRAM-1)	R3(Methyl)	1163		HLA-B07	20
RQPPPPPR	8	Q6ZRS2	Helicase SRCAP (EC 3.6.4.-) (Domino homolog 2) (Snf2-related CBP activator)	R1(Methyl)	1874		N/A
SPMADRSMM	9	P18583	Protein SON (Bax antagonist selected in saccharomyces 1) (BASS1) (Negative regulatory element-binding protein) (NRE-binding protein) (Protein DBP-5) (SON3)	R6(Methyl)	1081	Yes	HLA-B07	8
SPRISPATTL	10	Q8IVW6	AT-rich interactive domain-containing protein 3B (ARID domain-containing protein 3B) (Bright and dead ringer protein) (Bright-like protein)	R3(Methyl)	379		HLA-B07	9
SPRPSGPGPSSF	12	Q96T58	Msx2-interacting protein (SMART/HDAC1-associated repressor protein) (SPEN homolog)	R3(Methyl)	3027		HLA-B07	8
SRFDIPLGL	9	O94913	Pre-mRNA cleavage complex 2 protein Pcf11 (Pre-mRNA cleavage complex II protein Pcf11)	R2(Methyl)	1104		HLA-B27	36
SRHPFLTAL	9	P31749	RAC-alpha serine/threonine-protein kinase (EC 2.7.11.1) (Protein kinase B) (PKB) (Protein kinase B alpha) (PKB alpha) (Proto-oncogene c-Akt) (RAC-PK-alpha)	R2(Methyl)	206		HLA-B27	106
SRYQGVNLY	9	Q13310	Polyadenylate-binding protein 4 (PABP-4) (Poly(A)-binding protein 4) (Activated-platelet protein 1) (APP-1) (Inducible poly(A)-binding protein) (iPABP)	R2(Methyl)	290		HLA-B27	271
TPRPPGPGL	9	Q8NEZ4	Histone-lysine N-methyltransferase 2C (Lysine N-methyltransferase 2C) (EC 2.1.1.43) (Homologous to ALR protein) (Myeloid/lymphoid or mixed-lineage leukemia protein 3)	R3(Methyl)	2277		HLA-B07	10
VPPPPHRPL	9	Q9Y520	Protein PRRC2C	R7(Methyl)	715		HLA-B07	11
VPRPPSNPPARGTL	14	O43734	Adapter protein CIKS (Connection to IKK and SAPK/JNK) (Nuclear factor NF-kappa-B activator 1) (ACT1) (TRAF3-interacting protein 2)	R3(Methyl)	389		HLA-B07	7
VRNDEELNK	9	Q8IUE6	Histone H2A type 2-B	R2(Methyl)	89	Yes	N/A
YRLPNVHGR	9	Q13155	Aminoacyl tRNA synthase complex-interacting multifunctional protein 2 (Multisynthase complex auxiliary component p38) (Protein JTV-1)	R2(Methyl)	26	Yes	HLA-B27	29

## Sheet: Methylated HLA Biol Repl2
Supplementary Table 1. List of mono-methylated peptides identified in Biological Replicate 2.
Sequence	Length	Protein Group Accessions	Proteins	Modifications	PTM position in protein	PhosphoSitePlus Match	HLA predicted allele	IC50
APAARFNNSQF	11	Q99967	Cbp/p300-interacting transactivator 2 (MSG-related protein 1) (MRG-1) (P35srj)	R5(Methyl)	92		HLA-B07	18
APRGQRPESAL	11	P28062	Proteasome subunit beta type-8 (EC 3.4.25.1) (Low molecular mass protein 7) (Macropain subunit C13) (Multicatalytic endopeptidase complex subunit C13) (Proteasome component C13) (Proteasome subunit beta-5i) (Really interesting new gene 10 protein)	R3(Methyl)	11		HLA-B07	7
FPRNSIMHL	9	O95628	CCR4-NOT transcription complex subunit 4	R3(Methyl)	505		HLA-B07	12
FRISDFENR	9	Q32M45	Anoctamin-4 (Transmembrane protein 16D)	R2(Methyl)	831		HLA-B27	215
GRLSVILGL	9	Q6NXR4	TELO2-interacting protein 2	R2(Methyl)	202		HLA-B27	22
KGFGRGGAESHTFK	14	P50238	Cysteine-rich protein 1 (CRP-1) (Cysteine-rich heart protein) (CRHP) (hCRHP) (Cysteine-rich intestinal protein) (CRIP)	R5(Methyl)	68	Yes	HLA-A03	36
KRWEMDRGRGR	11	Q9NQ55	Suppressor of SWI4 1 homolog (Ssf-1) (Brix domain-containing protein 3) (Peter Pan homolog)	R9(Methyl)	428		HLA-B27	278
KRWEMDRGRGRL	12	Q9NQ55	Suppressor of SWI4 1 homolog (Ssf-1) (Brix domain-containing protein 3) (Peter Pan homolog)	M5(Oxidation); R9(Methyl)	428		HLA-B27	28
MQRIASLL	8	Q9BWH6	RNA polymerase II-associated protein 1	M1(Oxidation); R3(Methyl)	721		N/A
PSRTSQDRDPSSL	13	Q86VV8	Rotatin	R8(Methyl)	1540		N/A
QLYWSHPRK	9	P62273	40S ribosomal protein S29	R8(Methyl)	12	Yes	HLA-A03	19
RPMMPQKVQL	10	Q6PJG2	ELM2 and SANT domain-containing protein 1	R1(Methyl)	180		HLA-B07	9
RPPYNRAVSL	10	Q9Y6Q9	Nuclear receptor coactivator 3 (NCoA-3) (EC 2.3.1.48) (ACTR) (Amplified in breast cancer 1 protein) (AIB-1) (CBP-interacting protein) (pCIP) (Class E basic helix-loop-helix protein 42) (bHLHe42) (Receptor-associated coactivator 3) (RAC-3) (Steroid receptor coactivator protein 3) (SRC-3) (Thyroid hormone receptor activator molecule 1) (TRAM-1)	R1(Methyl)	849		HLA-B07	14
RPQKPSLEF	9	Q96AP0	Adrenocortical dysplasia protein homolog (POT1 and TIN2-interacting protein)	R1(Methyl)	450		HLA-B07	10
RPRFPVLL	8	P55265	Double-stranded RNA-specific adenosine deaminase (DRADA) (EC 3.5.4.37) (136 kDa double-stranded RNA-binding protein) (p136) (Interferon-inducible protein 4) (IFI-4) (K88DSRBP)	R3(Methyl)	74		HLA-B07	118
RPRGPSPLVTM	11	Q9Y2K2	Serine/threonine-protein kinase SIK3 (EC 2.7.11.1) (Salt-inducible kinase 3) (SIK-3) (Serine/threonine-protein kinase QSK)	R3(Methyl)	511		HLA-B07	7
RPRTNTPKQL	10	Q9Y6Q9	Nuclear receptor coactivator 3 (NCoA-3) (EC 2.3.1.48) (ACTR) (Amplified in breast cancer 1 protein) (AIB-1) (CBP-interacting protein) (pCIP) (Class E basic helix-loop-helix protein 42) (bHLHe42) (Receptor-associated coactivator 3) (RAC-3) (Steroid receptor coactivator protein 3) (SRC-3) (Thyroid hormone receptor activator molecule 1) (TRAM-1)	R3(Methyl)	1163		HLA-B07	20
RRLENRLVLL	10	Q96CM4	Nucleoredoxin-like protein 1 (Thioredoxin-like protein 6)	R6(Methyl)	33		HLA-B27	10
RRLIRGFVLR	10	O00159	Unconventional myosin-Ic (Myosin I beta) (MMI-beta) (MMIb)	R10(Methyl)	797		HLA-B27	14
RRMGPPVGGHRR	12	P14866	Heterogeneous nuclear ribonucleoprotein L (hnRNP L)	R2(Methyl)	344		HLA-B27	18
RRRERPKTP	9	Q9Y6V0	Protein piccolo	R3(Methyl)	1748		N/A
RTRGWVQTL	9	Q8N319	Uncharacterized protein C6orf223	R3(Methyl)	104		HLA-B07	68
RVRPKVTVL	9	Q6MZQ0	Proline-rich protein 5-like (Protein observed with Rictor-2) (Protor-2)	R3(Methyl)	245		HLA-B07	10
SPRPRAFDGAGSSL	14	Q8WUF5	RelA-associated inhibitor (Inhibitor of ASPP protein) (Protein iASPP) (NFkB-interacting protein 1) (PPP1R13B-like protein)	R3(Methyl)	142		HLA-B07	7
YRLPNVHGR	9	Q13155	Aminoacyl tRNA synthase complex-interacting multifunctional protein 2 (Multisynthase complex auxiliary component p38) (Protein JTV-1)	R2(Methyl)	26	Yes	HLA-B27	29

## Sheet: All Unique Methylated HLA
Supplementary Table 1. List of all the unique mono-methylated peptides identified.
Sequence	Length	Protein Group Accessions	Protein	Modifications	PTM position in protein	"+ - 7 aa sequence"	Unmodified	Phospho site plus	HLA predicted allele	IC50	Note
KGFGRGGAESHTFK	14	P50238	Cysteine-rich protein 1 (CRP-1) (Cysteine-rich heart protein)	R5(Methyl)	68	FGPKGFGRGGAESHT	Yes	Yes	HLA-A03	36
RLAHGVRLK	9	Q14692	Ribosome biogenesis protein BMS1 homolog	R7(Methyl)	1142	LRLAHGVRLKANKDS			HLA-A03	23
QLYWSHPRK	9	P62273	40S ribosomal protein S29	R8(Methyl)	12	QLYWSHPRKFGQGSR	Yes	Yes	HLA-A03	19
RPGAPPAAI	9	Q8NCW0	Kremen protein 2	R1(Methyl)	357	ANVSCSPRPGAPPAA	Yes		HLA-B07	14
RPMMPQKVQL	10	Q6PJG2	ELM2 and SANT domain-containing protein 1	R1(Methyl)	180	PQLDRYVRPMMPQKV	Yes		HLA-B07	9
RPPYNRAVSL	10	Q9Y6Q9	Nuclear receptor coactivator 3 (NCoA-3)	R1(Methyl)	849	SQSVQSIRPPYNRAV	Yes		HLA-B07	14
RPQKPSLEF	9	Q96AP0	Adrenocortical dysplasia protein homolog (POT1 and TIN2-interacting protein)	R1(Methyl)	450	PHQALVTRPQKPSLE	Yes		HLA-B07	10	Also Asymmetrically Dimethylated
APRGQRPESAL	11	P28062	Proteasome subunit beta type-8	R3(Methyl)	11	LDVCGAPRGQRPESA	Yes		HLA-B07	7
APRGVPQIEVTF	12	P11142	Heat shock cognate 71 kDa protein (Heat shock 70 kDa protein 8)	R3(Methyl)	469	TGIPPAPRGVPQIEV		Yes	HLA-B07	18
APRIITGPAPVL	12	Q96PU8	Protein quaking (Hqk) (HqkI)	R3(Methyl)	227	ATAQAAPRIITGPAP	Yes	Yes	HLA-B07	11
FPRNSIMHL	9	O95628	CCR4-NOT transcription complex subunit 4	R3(Methyl)	505	YPWMAFPRNSIMHLN			HLA-B07	12
LPRGAGGL	8	Q9Y6L7	Tolloid-like protein 2	R3(Methyl)	21	LLLLPLPRGAGGKGE			HLA-B07	84
LPRGRKQLAL	10	O60759	Cytohesin-interacting protein	R3(Methyl)	54	DTVATLPRGRKQLAL	Yes		HLA-B07	21
RPRFPVLL	8	P55265	Double-stranded RNA-specific adenosine deaminase (DRADA)	R3(Methyl)	74	SLPGLRPRFPVLLAS	Yes	Yes	HLA-B07	118
RPRGPPPPP	9	Q13435	Splicing factor 3B subunit 2 (Pre-mRNA-splicing factor SF3b 145 kDa subunit)	R3(Methyl)	247	GAPVPRPRGPPPPPG	Yes	Yes	HLA-B07	40	Also Asymmetrically Dimethylated
RPRGPSPLVTM	11	Q9Y2K2	Serine/threonine-protein kinase SIK3	R3(Methyl)	511	QQLLKRPRGPSPLVT	Yes		HLA-B07	7
RPRTNTPKQL	10	Q9Y6Q9	Nuclear receptor coactivator 3 (NCoA-3)	R3(Methyl)	1163	RANIMRPRTNTPKQL	Yes		HLA-B07	20
RTRGWVQTL	9	Q8N319	Uncharacterized protein C6orf223	R3(Methyl)	104	LRTRGRTRGWVQTLA	Yes		HLA-B07	68
RVRPKVTVL	9	Q6MZQ0	Proline-rich protein 5-like	R3(Methyl)	245	ARRHSRVRPKVTVLN			HLA-B07	10
SPRISPATTL	10	Q8IVW6	AT-rich interactive domain-containing protein 3B (ARID domain-containing protein 3B)	R3(Methyl)	379	GTNTSSPRISPATTL	Yes		HLA-B07	9
SPRPRAFDGAGSSL	14	Q8WUF5	RelA-associated inhibitor (Inhibitor of ASPP protein)	R3(Methyl)	142	LDRATSPRPRAFDGA	Yes		HLA-B07	7
SPRPSGPGPSSF	12	Q96T58	Msx2-interacting protein	R3(Methyl)	3027	KLDAHSPRPSGPGPS	Yes		HLA-B07	8
TPRPPGPGL	9	Q8NEZ4	Histone-lysine N-methyltransferase 2C (Lysine N-methyltransferase 2C)	R3(Methyl)	2277	DTCSQTPRPPGPGLS	Yes		HLA-B07	10
VPRPPSNPPARGTL	14	O43734	Adapter protein CIKS (Connection to IKK and SAPK/JNK)	R3(Methyl)	389	PSPAAVPRPPSNPPA	Yes		HLA-B07	7
APARPGPAA	9	Q04637	Eukaryotic translation initiation factor 4 gamma 1	R4(Methyl)	73	VQSAAPARPGPAAHV	Yes	Yes	HLA-B07	13
AAAARAAAL	9	Q96T25	Zinc finger protein ZIC 5	R5(Methyl)	123	EAPAAAARAAALVAH			HLA-B07	21
APAARFNNSQF	11	Q99967	Cbp/p300-interacting transactivator 2	R5(Methyl)	92	SALAPAARFNNSQFM			HLA-B07	18
APNYRLKSL	9	Q9HBM6	Transcription initiation factor TFIID subunit 9B	R5(Methyl)	128	CLTAPNYRLKSLIKK	Yes	Yes	HLA-B07	14	Also Asymmetrically Dimethylated
SPMADRSMM	9	P18583	Protein SON	R6(Methyl)	1081	MMSPMADRSMMSMGA	Yes	Yes	HLA-B07	8
MPYGQPRPPIL	11	Q9BXP5	Serrate RNA effector molecule homolog	R7(Methyl)	802	LMPYGQPRPPILGYG	Yes		HLA-B07	26
VPPPPHRPL	9	Q9Y520	Protein PRRC2C	R7(Methyl)	715	TVPPPPHRPLYQPMQ	Yes		HLA-B07	11
RRLIRGFVLR	10	O00159	Unconventional myosin-Ic (Myosin I beta)	R10(Methyl)	797	LIRGFVLRHAPRCPE			HLA-B27	14
FRISDFENR	9	Q32M45	Anoctamin-4 (Transmembrane protein 16D)	R2(Methyl)	831	NASLSVFRISDFENR			HLA-B27	215
GRLKAEIAR	9	P12270	Nucleoprotein TPR (Translocated promoter region protein)	R2(Methyl)	1377	QLTEEIGRLKAEIAR	Yes		HLA-B27	204
GRLSVILGL	9	Q6NXR4	TELO2-interacting protein 2	R2(Methyl)	202	ENEDEKGRLSVILGL			HLA-B27	22
RRMGPPVGGHRR	12	P14866	Heterogeneous nuclear ribonucleoprotein L (hnRNP L)	R2(Methyl)	344	PPHYEGRRMGPPVGG	Yes		HLA-B27	18
SRFDIPLGL	9	O94913	Pre-mRNA cleavage complex 2 protein Pcf11	R2(Methyl)	1104	PQHQQASRFDIPLGL	Yes		HLA-B27	2
SRHPFLTAL	9	P31749	RAC-alpha serine/threonine-protein kinase	R2(Methyl)	206	NRVLQNSRHPFLTAL			HLA-B27	4
SRYQGVNLY	9	Q13310	Polyadenylate-binding protein 4 (PABP-4) (Poly(A)-binding protein 4)	R2(Methyl)	290	LKQERISRYQGVNLY	Yes		HLA-B27	4
YRLPNVHGR	9	Q13155	Aminoacyl tRNA synthase complex-interacting multifunctional protein 2	R2(Methyl)	26	ELPTCMYRLPNVHGR	Yes	Yes	HLA-B27	29
RRLENRLVLL	10	Q96CM4	Nucleoredoxin-like protein 1 (Thioredoxin-like protein 6)	R6(Methyl)	33	VSRRLENRLVLLFFG			HLA-B27	10
KRWEMDRGRGR	11	Q9NQ55	Suppressor of SWI4 1 homolog (Ssf-1)	R9(Methyl)	428	RWEMDRGRGRLCDQK	Yes		HLA-B27	278
MQRIASLL	8	Q9BWH6	RNA polymerase II-associated protein 1	M1(Oxidation); R3(Methyl)	721	PQPLSMQRIASLLTL			N/A
RQPPPPPR	8	Q6ZRS2	WD repeat-containing protein 87	R1(Methyl)	1874	FGGPRPRRQPPPPPR			N/A		Also Asymmetrically Dimethylated
QREIEIMR	8	Q9NRP7	Serine/threonine-protein kinase 36	R2(Methyl)	50	KELRNLQREIEIMRG			N/A
QRPPRPPPR	9	Q5TBK1	NEDD4-binding protein 2-like 1	R2(Methyl)	24	QQQQQRQRPPRPPPR			N/A
VRNDEELNK	9	Q8IUE6	Histone H2A type 2-B	R2(Methyl)	89	RHLQLAVRNDEELNK		Yes	N/A		Also Asymmetrically Dimethylated
RRRERPKTP	9	Q9Y6V0	Protein piccolo	R3(Methyl)	1748	KDWLEAQRRRERPKT			N/A
GFGRGGAESHTFK	13	P50238	Cysteine-rich protein 1 (CRP-1) (Cysteine-rich heart protein)	R4(Methyl)	68	FGPKGFGRGGAESHT	Yes	Yes	N/A
LGGRAAASL	9	Q7Z5L9	Interferon regulatory factor 2-binding protein 2	R4(Methyl)	208	TALGLGGRAAASLAA			N/A
KGFGRGGAESHTF	13	P50238	Cysteine-rich protein 1 (CRP-1) (Cysteine-rich heart protein)	R5(Methyl)	68	FGPKGFGRGGAESHT	Yes	Yes	N/A
ALDLAKKRV	9	P40126	L-dopachrome tautomerase	R8(Methyl)	151	ALDLAKKRVHPDYVI			N/A
ALIEKSKRV	9	Q63HK3	Zinc finger protein with KRAB and SCAN domains 2	R8(Methyl)	692	ALIEKSKRVVSQSTD			N/A
PSRTSQDRDPSSL	13	Q86VV8	Rotatin	R8(Methyl)	1540	PSRTSQDRDPSSLST			N/A
RAGSPLPRS	9	Q9BQ50	Three prime repair exonuclease 2	R8(Methyl)	10	RAGSPLPRSSWPRMD			N/A

## Sheet: Dimethylated HLA Biol Repl1
Supplementary Table 1. List of di-methylated peptides identified in Biological Replicate 1.
Sequence	Length	Protein Group Accessions	Protein	Modifications	PTM position in protein	PhosphoSitePlus Match	HLA predicted allele	IC50
AARALAAAR	9	Q99501	GAS2-like protein 1 (GAS2-related protein on chromosome 22) (Growth arrest-specific protein 2-like 1)	R3(Dimethyl)	74		N/A
APARPGPAA	9	Q04637	Eukaryotic translation initiation factor 4 gamma 1 (eIF-4-gamma 1) (eIF-4G 1) (eIF-4G1) (p220)	R4(Dimethyl)	73		HLA-B07	13
APQRPLSTF	9	Q9Y242	Transcription factor 19 (TCF-19) (Transcription factor SC1)	R4(Dimethyl)	161		HLA-B07	18
APRALLLLL	9	Q29865	HLA class I histocompatibility antigen, Cw-18 alpha chain	R3(Dimethyl)	7		HLA-B07	18
APRASVPSVQI	11	Q86YP4	Transcriptional repressor p66-alpha (Hp66alpha) (GATA zinc finger domain-containing protein 2A)	R3(Dimethyl)	273	Yes	HLA-B07	17
APRGQRPESAL	11	P28062	Proteasome subunit beta type-8 (EC 3.4.25.1) (Low molecular mass protein 7) (Macropain subunit C13) (Multicatalytic endopeptidase complex subunit C13) (Proteasome component C13) (Proteasome subunit beta-5i) (Really interesting new gene 10 protein)	R3(Dimethyl)	11		HLA-B07	7
APRIITGPAPVL	12	Q96PU8	Protein quaking (Hqk) (HqkI)	R3(Dimethyl)	227		HLA-B07	11
APRMPFSIGQVTM	13	Q8ND24	RING finger protein 214	R3(Dimethyl); M13(Oxidation)	462		HLA-B07	9
APRPAAAAATAL	12	Q9UKJ3	G patch domain-containing protein 8	R3(Dimethyl)	1470		HLA-B07	7
APRPPFSTM	9	P11940	Polyadenylate-binding protein 1 (PABP-1) (Poly(A)-binding protein 1)	R3(Dimethyl)	460	Yes	HLA-B07	7
APRPPPMIVPTAF	13	Q15459	Splicing factor 3A subunit 1	R3(Dimethyl)	642		HLA-B07	9
APRPPSSGL	9	Q6ZRS2	Helicase SRCAP (EC 3.6.4.-) (Domino homolog 2) (Snf2-related CBP activator)	R3(Dimethyl)	1332		HLA-B07	7
APRPPSSGLPAVL	13	Q6ZRS2	Helicase SRCAP (EC 3.6.4.-) (Domino homolog 2) (Snf2-related CBP activator)	R3(Dimethyl)	1332		HLA-B07	8
ARNRPPFGQGY	11	Q92734	Protein TFG (TRK-fused gene protein)	R4(Dimethyl)	385	Yes	HLA-B27	828
CRSLSAVGR	9	Q76NI1	Protein very KIND	R2(Dimethyl)	198		N/A
FPGGPRPTL	9	Q9BWG4	Single-stranded DNA-binding protein 4	R6(Dimethyl)	157		HLA-B07	15
GERELEAKARP	11	Q8N7F7	Ubiquitin-like protein 4B	R10(Dimethyl)	157		N/A
GPAPGMRPPM	10	P09234	U1 small nuclear ribonucleoprotein C (U1 snRNP C) (U1-C) (U1C)	R7(Dimethyl)	123		HLA-B07	13
GPGGPRGGL	9	Q13283	Ras GTPase-activating protein-binding protein 1 (G3BP-1)	R6(Dimethyl)	435		HLA-B07	14
GPRGGKSSISSV	12	P51114	Fragile X mental retardation syndrome-related protein 1 (hFXR1p)	R3(Dimethyl)	459		HLA-B07	12
GPRGGKSSISSVL	13	P51114	Fragile X mental retardation syndrome-related protein 1 (hFXR1p)	R3(Dimethyl)	459		HLA-B07	10
GRFGSRGGPGGGF	13	Q12905	Interleukin enhancer-binding factor 2 (Nuclear factor of activated T-cells 45 kDa)	R6(Dimethyl)	16	Yes	HLA-B27	51
GYGGGRGGYGGGGP	14	P22626	Heterogeneous nuclear ribonucleoproteins A2/B1 (hnRNP A2/B1)	R6(Dimethyl)	266	Yes	N/A
HPRQAAPQM	9	Q9UPN9	E3 ubiquitin-protein ligase TRIM33 (EC 6.3.2.-) (Ectodermin homolog) (RET-fused gene 7 protein) (Protein Rfg7) (Transcription intermediary factor 1-gamma) (TIF1-gamma) (Tripartite motif-containing protein 33)	R3(Dimethyl)	555		HLA-B07	11
HPRQAAPQML	10	Q9UPN9	E3 ubiquitin-protein ligase TRIM33 (EC 6.3.2.-) (Ectodermin homolog) (RET-fused gene 7 protein) (Protein Rfg7) (Transcription intermediary factor 1-gamma) (TIF1-gamma) (Tripartite motif-containing protein 33)	R3(Dimethyl)	555		HLA-B07	36
KGFGRGGAESHTFK	14	P50238	Cysteine-rich protein 1 (CRP-1) (Cysteine-rich heart protein) (CRHP) (hCRHP) (Cysteine-rich intestinal protein) (CRIP)	R5(Dimethyl)	68	Yes	HLA-A03	36
LPVRPQTNAL	10	Q14677	Clathrin interactor 1 (Clathrin-interacting protein localized in the trans-Golgi region) (Clint) (Enthoprotin) (Epsin-4) (Epsin-related protein) (EpsinR)	R4(Dimethyl)	538	Yes	HLA-B07	40
PVRPQTNAL	9	Q14677	Clathrin interactor 1	R3(Dimethyl)	538		HLA-B07	69
QPRFGNSQSF	10	Q6N021	Peroxisome proliferator-activated receptor gamma coactivator-related protein 1 (PGC-1-related coactivator) (PRC)	R3(Dimethyl)	1682	Yes	HLA-B07	24
RNSRLAVQLR	10	Q9BY76	Angiopoietin-related protein 4 (Angiopoietin-like protein 4) (Hepatic fibrinogen/angiopoietin-related protein) (HFARP)	R4(Dimethyl)	272		N/A
RPAFVPHVL	9	Q9BTD8	RNA-binding protein 42 (RNA-binding motif protein 42)	R1(Dimethyl)	158	Yes	HLA-B07	13
RPKSNIVLL	9	P11836	B-lymphocyte antigen CD20	R1(Dimethyl)	122		HLA-B07	36
RPLRGAKTL	9	Q8WWM7	Ataxin-2-like protein (Ataxin-2 domain protein) (Ataxin-2-related protein)	R4(Dimethyl)	417		HLA-B07	12
RPRTNTPKQL	10	Q9Y6Q9	Nuclear receptor coactivator 3 (NCoA-3) (EC 2.3.1.48) (ACTR) (Amplified in breast cancer 1 protein) (AIB-1) (CBP-interacting protein) (pCIP) (Class E basic helix-loop-helix protein 42) (bHLHe42) (Receptor-associated coactivator 3) (RAC-3) (Steroid receptor coactivator protein 3) (SRC-3) (Thyroid hormone receptor activator molecule 1) (TRAM-1)	R3(Dimethyl)	1163		HLA-B07	20
RTRLAAWAR	9	Q9UNF1	Melanoma-associated antigen D2 (11B6) (Breast cancer-associated gene 1 protein) (BCG-1) (Hepatocellular carcinoma-associated protein JCL-1) (MAGE-D2 antigen)	R9(Dimethyl)	239		N/A
SPRISPATTL	10	Q8IVW6	AT-rich interactive domain-containing protein 3B (ARID domain-containing protein 3B) (Bright and dead ringer protein) (Bright-like protein)	R3(Dimethyl)	379		HLA-B07	9
TPRPPGPGL	9	Q8NEZ4	Histone-lysine N-methyltransferase 2C (Lysine N-methyltransferase 2C) (EC 2.1.1.43) (Homologous to ALR protein) (Myeloid/lymphoid or mixed-lineage leukemia protein 3)	R3(Dimethyl)	2277		HLA-B07	10
TPVRPGSTM	9	Q7Z3K3	Pogo transposable element with ZNF domain (Suppressor of hairy wing homolog 5) (Zinc finger protein 280E) (Zinc finger protein 635)	R4(Dimethyl)	213		HLA-B07	13
TSRPPTPTL	9	Q6ZRS2	Helicase SRCAP	R3(Dimethyl)	1098		N/A
VPPPPHRPL	9	Q9Y520	Protein PRRC2C (BAT2 domain-containing protein 1) (HBV X-transactivated gene 2 protein) (HBV XAg-transactivated protein 2) (HLA-B-associated transcript 2-like 2) (Proline-rich and coiled-coil-containing protein 2C)	R7(Dimethyl)	715		HLA-B07	11
VPRYPNAVGF	10	Q9P2D1	Chromodomain-helicase-DNA-binding protein 7 (CHD-7) (EC 3.6.4.12) (ATP-dependent helicase CHD7)	R3(Dimethyl)	346		HLA-B07	34
VRQVSPGPRP	10	Q5VV67	Peroxisome proliferator-activated receptor gamma coactivator-related protein 1	R9(Dimethyl)	373		N/A
YGYNQRPPYGYY	12	Q9BTL3	RNMT-activating mini protein (RAM) (Protein FAM103A1)	R6(Dimethyl)	112		N/A
YPGGPRPPL	9	P81877	Single-stranded DNA-binding protein 2 (Sequence-specific single-stranded-DNA-binding protein 2)	R6(Dimethyl)	136		HLA-B07	8
YPRQPNYNAL	10	O14497	AT-rich interactive domain-containing protein 1A (ARID domain-containing protein 1A) (B120) (BRG1-associated factor 250) (BAF250) (BRG1-associated factor 250a) (BAF250A) (Osa homolog 1) (hOSA1) (SWI-like protein) (SWI/SNF complex protein p270) (SWI/SNF-related, matrix-associated, actin-dependent regulator of chromatin subfamily F member 1) (hELD)	R3(Dimethyl)	811		HLA-B07	19
YSAGKRGGFNTF	12	P17844	Probable ATP-dependent RNA helicase DDX5 (EC 3.6.4.13) (DEAD box protein 5) (RNA helicase p68)	R6(Dimethyl)	502	Yes	N/A

## Sheet: Diemthylated HLA Biol Repl 2
Supplementary Table 1. List of di-methylated peptides identified in Biological Replicate 2.
Sequence	Length	Protein Group Accessions	Protein	Modifications	PTM position in protein	PhosphoSitePlus Match	HLA predicted allele	IC50
APDGRQRLPF	10	Q8NEZ4	Histone-lysine N-methyltransferase 2C (Lysine N-methyltransferase 2C) (EC 2.1.1.43) (Homologous to ALR protein) (Myeloid/lymphoid or mixed-lineage leukemia protein 3)	R7(Dimethyl)	2571		HLA-B07	57
APRPAAAAATAL	12	Q9UKJ3	G patch domain-containing protein 8	R3(Dimethyl)	1470		HLA-B07	7
APRPPSSGLPAVL	13	Q6ZRS2	Helicase SRCAP (EC 3.6.4.-) (Domino homolog 2) (Snf2-related CBP activator)	R3(Dimethyl)	1332		HLA-B07	8
APRRPTQQGTVTF	13	Q8TAU3	Zinc finger protein 417	R3(Dimethyl)	7		HLA-B07	9
APSLRHSVQQF	11	Q9P2D1	Chromodomain-helicase-DNA-binding protein 7 (CHD-7) (EC 3.6.4.12) (ATP-dependent helicase CHD7)	R5(Dimethyl)	250		HLA-B07	44
ARNRPPFGQGY	11	Q92734	Protein TFG (TRK-fused gene protein)	R4(Dimethyl)	385	Yes	HLA-B27	828
FRSRGGGGGGFH	12	P23246	Splicing factor, proline- and glutamine-rich (100 kDa DNA-pairing protein) (hPOMp100) (DNA-binding p52/p100 complex, 100 kDa subunit) (Polypyrimidine tract-binding protein-associated-splicing factor) (PSF) (PTB-associated-splicing factor)	R4(Dimethyl)	9	Yes	N/A
FRSRGGGGGGFHR	13	P23246	Splicing factor, proline- and glutamine-rich (100 kDa DNA-pairing protein) (hPOMp100) (DNA-binding p52/p100 complex, 100 kDa subunit) (Polypyrimidine tract-binding protein-associated-splicing factor) (PSF) (PTB-associated-splicing factor)	R4(Dimethyl)	9	Yes	HLA-B27	144
GMRGPPRGGMVQK	13	Q13283	Ras GTPase-activating protein-binding protein 1 (G3BP-1) (EC 3.6.4.12) (EC 3.6.4.13) (ATP-dependent DNA helicase VIII) (hDH VIII) (GAP SH3 domain-binding protein 1)	R7(Dimethyl)	447	Yes	HLA-A03	49
GPRGGKSSISSV	12	P51114	Fragile X mental retardation syndrome-related protein 1 (hFXR1p)	R3(Dimethyl)	459		HLA-B07	12
GPRGGKSSISSVL	13	P51114	Fragile X mental retardation syndrome-related protein 1 (hFXR1p)	R3(Dimethyl)	459		HLA-B07	10
GPRGGLGGGM	10	Q13283	Ras GTPase-activating protein-binding protein 1 (G3BP-1) (EC 3.6.4.12) (EC 3.6.4.13) (ATP-dependent DNA helicase VIII) (hDH VIII) (GAP SH3 domain-binding protein 1)	R3(Dimethyl)	435	Yes	HLA-B07	21
GRFGSRGGPGGGFR	14	Q12905	Interleukin enhancer-binding factor 2 (Nuclear factor of activated T-cells 45 kDa)	R6(Dimethyl)	16	Yes	HLA-B27	69
HPRQAAPQML	10	Q9UPN9	E3 ubiquitin-protein ligase TRIM33 (EC 6.3.2.-) (Ectodermin homolog) (RET-fused gene 7 protein) (Protein Rfg7) (Transcription intermediary factor 1-gamma) (TIF1-gamma) (Tripartite motif-containing protein 33)	R3(Dimethyl)	555		HLA-B07	36
HPSPRGRSL	9	P55265	Double-stranded RNA-specific adenosine deaminase (DRADA) (EC 3.5.4.37) (136 kDa double-stranded RNA-binding protein) (p136) (Interferon-inducible protein 4) (IFI-4) (K88DSRBP)	R5(Dimethyl)	114		HLA-B07	7
KGFGRGGAESHTFK	14	P50238	Cysteine-rich protein 1 (CRP-1) (Cysteine-rich heart protein) (CRHP) (hCRHP) (Cysteine-rich intestinal protein) (CRIP)	R5(Dimethyl)	68	Yes	HLA-A03	36
KRWEMDRGRGR	11	Q9NQ55	Suppressor of SWI4 1 homolog (Ssf-1) (Brix domain-containing protein 3) (Peter Pan homolog)	R9(Dimethyl)	428		HLA-B27	278
LRTAETITGK	10	Q99972	Myocilin	R2(Dimethyl)	258		HLA-B27	317
NTDTSSERGRY	11	Q9NYL2	Mitogen-activated protein kinase kinase kinase MLT (EC 2.7.11.25) (Human cervical cancer suppressor gene 4 protein) (HCCS-4) (Leucine zipper- and sterile alpha motif-containing kinase) (MLK-like mitogen-activated protein triple kinase) (Mixed lineage kinase-related kinase) (MLK-related kinase) (MRK) (Sterile alpha motif- and leucine zipper-containing kinase AZK)	R8(Dimethyl)	670		HLA-A01	6
QPRFGNSQSF	10	Q6N021	Methylcytosine dioxygenase TET2 (EC 1.14.11.n2)	R3(Dimethyl)	1682	Yes	HLA-B07	24
RASDGSLLY	9	Q3KQV9	UDP-N-acetylhexosamine pyrophosphorylase-like protein 1	R1(Dimethyl)	318		HLA-A01	235
RLLELAGrSVLR	12	A6NGN4	PRAME family member 25	R8(Dimethyl)	10		HLA-A03	163
RPAFVPHVL	9	Q9BTD8	RNA-binding protein 42 (RNA-binding motif protein 42)	R1(Dimethyl)	158	Yes	HLA-B07	13
RPLRGAKTL	9	Q8WWM7	Ataxin-2-like protein (Ataxin-2 domain protein) (Ataxin-2-related protein)	R4(Dimethyl)	417		HLA-B07	12
RPMMPQKVQL	10	Q6PJG2	ELM2 and SANT domain-containing protein 1 (MIDEAS)	R1(Dimethyl)	180		HLA-B07	9
RPPYNRAVSL	10	Q9Y6Q9	Nuclear receptor coactivator 3 (NCoA-3) (EC 2.3.1.48) (ACTR) (Amplified in breast cancer 1 protein) (AIB-1) (CBP-interacting protein) (pCIP) (Class E basic helix-loop-helix protein 42) (bHLHe42) (Receptor-associated coactivator 3) (RAC-3) (Steroid receptor coactivator protein 3) (SRC-3) (Thyroid hormone receptor activator molecule 1) (TRAM-1)	R1(Dimethyl)	849		HLA-B07	14
RPQKPSLEF	9	Q96AP0	Adrenocortical dysplasia protein homolog (POT1 and TIN2-interacting protein)	R1(Dimethyl)	450		HLA-B07	10
RPRFPVLL	8	P55265	Double-stranded RNA-specific adenosine deaminase (DRADA)	R3(Dimethyl)	74		HLA-B07	118
RPRFPVLLA	9	P55265	Double-stranded RNA-specific adenosine deaminase (DRADA) (EC 3.5.4.37) (136 kDa double-stranded RNA-binding protein) (p136) (Interferon-inducible protein 4) (IFI-4) (K88DSRBP)	R3(Dimethyl)	74		HLA-B07	16
RPRGPSPLVTM	11	Q9Y2K2	Serine/threonine-protein kinase SIK3 (EC 2.7.11.1) (Salt-inducible kinase 3) (SIK-3) (Serine/threonine-protein kinase QSK)	R3(Dimethyl)	511		HLA-B07	7
RPRTNTPKQL	10	Q9Y6Q9	Nuclear receptor coactivator 3 (NCoA-3) (EC 2.3.1.48) (ACTR) (Amplified in breast cancer 1 protein) (AIB-1) (CBP-interacting protein) (pCIP) (Class E basic helix-loop-helix protein 42) (bHLHe42) (Receptor-associated coactivator 3) (RAC-3) (Steroid receptor coactivator protein 3) (SRC-3) (Thyroid hormone receptor activator molecule 1) (TRAM-1)	R3(Dimethyl)	1163		HLA-B07	20
RRAASALLL	9	Q9H1K1	Iron-sulfur cluster assembly enzyme ISCU, mitochondrial	R2(Dimethyl)	19		HLA-B27	19
RRALRQERRK	10	Q8IYS4	Uncharacterized protein C16orf71	R5(Dimethyl)	200		HLA-B27	34
RRYRRGYYGR	10	P16989	Y-box-binding protein 3	R5(Dimethyl)	179		HLA-B27	10
SPRGGTPGSGAAA	13	O14497	AT-rich interactive domain-containing protein 1A (ARID domain-containing protein 1A) (B120) (BRG1-associated factor 250) (BAF250) (BRG1-associated factor 250a) (BAF250A) (Osa homolog 1) (hOSA1) (SWI-like protein) (SWI/SNF complex protein p270) (SWI/SNF-related, matrix-associated, actin-dependent regulator of chromatin subfamily F member 1) (hELD)	R3(Dimethyl)	235		HLA-B07	9
SPRGGTPGSGAAAA	14	O14497	AT-rich interactive domain-containing protein 1A (ARID domain-containing protein 1A) (B120) (BRG1-associated factor 250) (BAF250) (BRG1-associated factor 250a) (BAF250A) (Osa homolog 1) (hOSA1) (SWI-like protein) (SWI/SNF complex protein p270) (SWI/SNF-related, matrix-associated, actin-dependent regulator of chromatin subfamily F member 1) (hELD)	R3(Dimethyl)	235		HLA-B07	9
SPRPRAFDGAGSSL	14	Q8WUF5	RelA-associated inhibitor (Inhibitor of ASPP protein) (Protein iASPP) (NFkB-interacting protein 1) (PPP1R13B-like protein)	R3(Dimethyl)	142		HLA-B07	7
SPRQPSGGQIHTGM	14	O14497	AT-rich interactive domain-containing protein 1A (ARID domain-containing protein 1A) (B120) (BRG1-associated factor 250) (BAF250) (BRG1-associated factor 250a) (BAF250A) (Osa homolog 1) (hOSA1) (SWI-like protein) (SWI/SNF complex protein p270) (SWI/SNF-related, matrix-associated, actin-dependent regulator of chromatin subfamily F member 1) (hELD)	R3(Dimethyl)	774		HLA-B07	8
SPRTSTPFGSGRV	13	Q8TAP9	M-phase-specific PLK1-interacting protein (TTD non-photosensitive 1 protein)	R3(Dimethyl)	117	Yes	HLA-B07	12
SPSYPGHRL	9	Q8NF64	Zinc finger MIZ domain-containing protein 2 (PIAS-like protein Zimp7)	R8(Dimethyl)	309		HLA-B07	12
TPRPPGPGLSDTF	13	Q8NEZ4	Histone-lysine N-methyltransferase 2C (Lysine N-methyltransferase 2C) (EC 2.1.1.43) (Homologous to ALR protein) (Myeloid/lymphoid or mixed-lineage leukemia protein 3)	R3(Dimethyl)	2277		HLA-B07	19
VPPPPHRPL	9	Q9Y520	Protein PRRC2C	R7(Dimethyl)	715		HLA-B07	11
VPRYPNAVGF	10	Q9P2D1	Chromodomain-helicase-DNA-binding protein 7 (CHD-7) (EC 3.6.4.12) (ATP-dependent helicase CHD7)	R3(Dimethyl)	346		HLA-B07	34
YPRQPNYNAL	10	O14497	AT-rich interactive domain-containing protein 1A (ARID domain-containing protein 1A) (B120) (BRG1-associated factor 250) (BAF250) (BRG1-associated factor 250a) (BAF250A) (Osa homolog 1) (hOSA1) (SWI-like protein) (SWI/SNF complex protein p270) (SWI/SNF-related, matrix-associated, actin-dependent regulator of chromatin subfamily F member 1) (hELD)	R3(Dimethyl)	811		HLA-B07	19

## Sheet: All Unique Dimethylated HLA
Supplementary Table 1. List of all the identified unique di-methylated peptides.
Sequence	Length	Protein Group Accessions	Protein Description	Modifications	PTM position in protein	"+ - 7 aa sequence"	Unmodified	PhosphoSitePlus Match	HLA predicted allele	IC50	Note
RASDGSLLY	9	Q3KQV9	UDP-N-acetylhexosamine pyrophosphorylase-like protein 1	R1(Dimethyl)	318	SPETAQLRASDGSLL			HLA-A01	235
NTDTSSERGRY	11	Q9NYL2	Mitogen-activated protein kinase kinase kinase MLT	R8(Dimethyl)	670	NTDTSSERGRYSDRS	Yes		HLA-A01	6
KGFGRGGAESHTFK	14	P50238	Cysteine-rich protein 1 (CRP-1) (Cysteine-rich heart protein)	R5(Dimethyl)	68	FGPKGFGRGGAESHT	Yes	Yes	HLA-A03	36	Asymmetrical
GMRGPPRGGMVQK	13	Q13283	Ras GTPase-activating protein-binding protein 1 (G3BP-1)	R7(Dimethyl)	447	GGMRGPPRGGMVQKP		Yes	HLA-A03	49
RLLELAGRSVLR	12	A6NGN4	PRAME family member 25	R8(Dimethyl)	10	MSIRTPPRLLELAGR			HLA-A03	163
RPAFVPHVL	9	Q9BTD8	RNA-binding protein 42 (RNA-binding motif protein 42)	R1(Dimethyl)	158	PQRAPILRPAFVPHV		Yes	HLA-B07	13	Asymmetrical
RPKSNIVLL	9	P11836	B-lymphocyte antigen CD20	R1(Dimethyl)	122	EWKRTCSRPKSNIVL	Yes		HLA-B07	36
RPMMPQKVQL	10	Q6PJG2	ELM2 and SANT domain-containing protein 1 (MIDEAS)	R1(Dimethyl)	180	PQLDRYVRPMMPQKV	Yes		HLA-B07	9
RPPYNRAVSL	10	Q9Y6Q9	Nuclear receptor coactivator 3 (NCoA-3)	R1(Dimethyl)	849	SQSVQSIRPPYNRAV	Yes		HLA-B07	14
RPQKPSLEF	9	Q96AP0	Adrenocortical dysplasia protein homolog	R1(Dimethyl)	450	PHQALVTRPQKPSLE	Yes		HLA-B07	10
APRASVPSVQI	11	Q86YP4	Transcriptional repressor p66-alpha (Hp66alpha)	R3(Dimethyl)	273	PPLLLAPRASVPSVQ		Yes	HLA-B07	17	Asymmetrical
APRGQRPESAL	11	P28062	Proteasome subunit beta type-8	R3(Dimethyl)	11	LDVCGAPRGQRPESA	Yes		HLA-B07	7	Asymmetrical
APRIITGPAPVL	12	Q96PU8	Protein quaking (Hqk)	R3(Dimethyl)	227	ATAQAAPRIITGPAP	Yes		HLA-B07	11	Asymmetrical
APRPPFSTM	9	P11940	Polyadenylate-binding protein 1 (PABP-1) (Poly(A)-binding protein 1)	R3(Dimethyl)	460	AIRPAAPRPPFSTMR		Yes	HLA-B07	7	Asymmetrical
APRPPPMIVPTAF	13	Q15459	Splicing factor 3A subunit 1	R3(Dimethyl)	642	APPIMAPRPPPMIVP			HLA-B07	9	Asymmetrical
GPRGGKSSISSV	12	P51114	Fragile X mental retardation syndrome-related protein 1 (hFXR1p)	R3(Dimethyl)	459	GRGRGGPRGGKSSIS			HLA-B07	12	Asymmetrical
GPRGGKSSISSVL	13	P51114	Fragile X mental retardation syndrome-related protein 1 (hFXR1p)	R3(Dimethyl)	459	GRGRGGPRGGKSSIS			HLA-B07	10	Asymmetrical
GPRGGLGGGM	10	Q13283	Ras GTPase-activating protein-binding protein 1 (G3BP-1)	R3(Dimethyl)	435	LRGPGGPRGGLGGGM		Yes	HLA-B07	21	Asymmetrical
HPRQAAPQM	9	Q9UPN9	E3 ubiquitin-protein ligase TRIM33	R3(Dimethyl)	555	TTTQQHPRQAAPQML			HLA-B07	11	Asymmetrical
HPRQAAPQML	10	Q9UPN9	E3 ubiquitin-protein ligase TRIM33	R3(Dimethyl)	555	TTTQQHPRQAAPQML			HLA-B07	36	Asymmetrical
RPRFPVLLA	9	P55265	Double-stranded RNA-specific adenosine deaminase (DRADA)	R3(Dimethyl)	74	SLPGLRPRFPVLLAS	Yes		HLA-B07	16	Asymmetrical
RPRTNTPKQL	10	Q9Y6Q9	Nuclear receptor coactivator 3 (NCoA-3)	R3(Dimethyl)	1163	RANIMRPRTNTPKQL	Yes		HLA-B07	20	Asymmetrical
SPRQPSGGQIHTGM	14	O14497	AT-rich interactive domain-containing protein 1A (ARID domain-containing protein 1A)	R3(Dimethyl)	774	PGSALSPRQPSGGQI	Yes		HLA-B07	8	Asymmetrical
TPRPPGPGL	9	Q8NEZ4	Histone-lysine N-methyltransferase 2C (Lysine N-methyltransferase 2C)	R3(Dimethyl)	2277	DTCSQTPRPPGPGLS	Yes	Yes	HLA-B07	10	Asymmetrical
VPRYPNAVGF	10	Q9P2D1	Chromodomain-helicase-DNA-binding protein 7 (CHD-7)	R3(Dimethyl)	346	PMNQSVPRYPNAVGF			HLA-B07	34	Asymmetrical
APRALLLLL	9	Q29865	HLA class I histocompatibility antigen, Cw-18 alpha chain	R3(Dimethyl)	7	_MRVMAPRALLLLLS	Yes		HLA-B07	18
APRPAAAAATAL	12	Q9UKJ3	G patch domain-containing protein 8	R3(Dimethyl)	1470	YPTLLAPRPAAAAAT			HLA-B07	7
APRPPSSGL	9	Q6ZRS2	Helicase SRCAP	R3(Dimethyl)	1332	PPLAPAPRPPSSGLP			HLA-B07	7
APRPPSSGLPAVL	13	Q6ZRS2	Helicase SRCAP	R3(Dimethyl)	1332	PPLAPAPRPPSSGLP	Yes		HLA-B07	8
APRRPTQQGTVTF	13	Q8TAU3	Zinc finger protein 417	R3(Dimethyl)	7	_MAAAAPRRPTQQGT	Yes		HLA-B07	9
PVRPQTNAL	9	Q14677	Clathrin interactor 1	R3(Dimethyl)	538	PSNMLPVRPQTNALI		Yes	HLA-B07	69
QPRFGNSQSF	10	Q6N021	Methylcytosine dioxygenase TET2	R3(Dimethyl)	1682	IHTLYQPRFGNSQSF		Yes	HLA-B07	24
RPRFPVLL	8	P55265	Double-stranded RNA-specific adenosine deaminase (DRADA)	R3(Dimethyl)	74	SLPGLRPRFPVLLAS	Yes		HLA-B07	118
RPRGPSPLVTM	11	Q9Y2K2	Serine/threonine-protein kinase SIK3	R3(Dimethyl)	511	QQLLKRPRGPSPLVT	Yes		HLA-B07	7
SPRGGTPGSGAAA	13	O14497	AT-rich interactive domain-containing protein 1A (ARID domain-containing protein 1A)	R3(Dimethyl)	235	AYALSSPRGGTPGSG			HLA-B07	9
SPRGGTPGSGAAAA	14	O14497	AT-rich interactive domain-containing protein 1A (ARID domain-containing protein 1A)	R3(Dimethyl)	235	AYALSSPRGGTPGSG	Yes		HLA-B07	9
SPRISPATTL	10	Q8IVW6	AT-rich interactive domain-containing protein 3B (ARID domain-containing protein 3B)	R3(Dimethyl)	379	GTNTSSPRISPATTL	Yes		HLA-B07	9
SPRPRAFDGAGSSL	14	Q8WUF5	RelA-associated inhibitor (Inhibitor of ASPP protein)	R3(Dimethyl)	142	LDRATSPRPRAFDGA	Yes		HLA-B07	7
SPRTSTPFGSGRV	13	Q8TAP9	M-phase-specific PLK1-interacting protein	R3(Dimethyl)	117	THPQGSPRTSTPFGS		Yes	HLA-B07	12
TPRPPGPGLSDTF	13	Q8NEZ4	Histone-lysine N-methyltransferase 2C (Lysine N-methyltransferase 2C)	R3(Dimethyl)	2277	DTCSQTPRPPGPGLS		Yes	HLA-B07	19
YPRQPNYNAL	10	O14497	AT-rich interactive domain-containing protein 1A (ARID domain-containing protein 1A)	R3(Dimethyl)	811	GPQGGYPRQPNYNAL	Yes		HLA-B07	19
APRMPFSIGQVTM	13	Q8ND24	RING finger protein 214	R3(Dimethyl); M13(Oxidation)	462	PSPSLAPRMPFSIGQ			HLA-B07	9
APARPGPAA	9	Q04637	Eukaryotic translation initiation factor 4 gamma 1 (eIF-4-gamma 1)	R4(Dimethyl)	73	VQSAAPARPGPAAHV	Yes		HLA-B07	13	Asymmetrical
APQRPLSTF	9	Q9Y242	Transcription factor 19 (TCF-19)	R4(Dimethyl)	161	PSQGAPQRPLSTFSP	Yes		HLA-B07	18	Asymmetrical
RPLRGAKTL	9	Q8WWM7	Ataxin-2-like protein (Ataxin-2 domain protein) (Ataxin-2-related protein)	R4(Dimethyl)	417	PKAQRPLRGAKTLSS			HLA-B07	12	Asymmetrical
TPVRPGSTM	9	Q7Z3K3	Pogo transposable element with ZNF domain	R4(Dimethyl)	213	FSQMTPVRPGSTMPV			HLA-B07	13	Asymmetrical
LPVRPQTNAL	10	Q14677	Clathrin interactor 1	R4(Dimethyl)	538	PSNMLPVRPQTNALI	Yes	Yes	HLA-B07	40
HPSPRGRSL	9	P55265	Double-stranded RNA-specific adenosine deaminase (DRADA)	R5(Dimethyl)	114	GFQHPSPRGRSLPQR			HLA-B07	7	Asymmetrical
APSLRHSVQQF	11	Q9P2D1	Chromodomain-helicase-DNA-binding protein 7 (CHD-7)	R5(Dimethyl)	250	PSMAPSLRHSVQQFH	Yes		HLA-B07	44	Symmetrical
FPGGPRPTL	9	Q9BWG4	Single-stranded DNA-binding protein 4	R6(Dimethyl)	157	PRFPGGPRPTLRMPS			HLA-B07	15	Asymmetrical
YPGGPRPPL	9	P81877	Single-stranded DNA-binding protein 2 (Sequence-specific single-stranded-DNA-binding protein 2)	R6(Dimethyl)	136	PRYPGGPRPPLRIPN			HLA-B07	8	Asymmetrical
GPGGPRGGL	9	Q13283	Ras GTPase-activating protein-binding protein 1 (G3BP-1)	R6(Dimethyl)	435	LRGPGGPRGGLGGGM	Yes	Yes	HLA-B07	14
APDGRQRLPF	10	Q8NEZ4	Histone-lysine N-methyltransferase 2C (Lysine N-methyltransferase 2C)	R7(Dimethyl)	2571	RAPDGRQRLPFSAPP			HLA-B07	57	Asymmetrical
VPPPPHRPL	9	Q9Y520	Protein PRRC2C	R7(Dimethyl)	715	TVPPPPHRPLYQPMQ	Yes		HLA-B07	11	Asymmetrical
GPAPGMRPPM	10	P09234	U1 small nuclear ribonucleoprotein C	R7(Dimethyl)	123	VGPAPGMRPPMGGHM			HLA-B07	13
SPSYPGHRL	9	Q8NF64	Zinc finger MIZ domain-containing protein 2	R8(Dimethyl)	309	SPSYPGHRLPLQQGM			HLA-B07	12
LRTAETITGK	10	Q99972	Myocilin	R2(Dimethyl)	258	VGEPLTLRTAETITG			HLA-B27	317
RRAASALLL	9	Q9H1K1	Iron-sulfur cluster assembly enzyme ISCU, mitochondrial	R2(Dimethyl)	19	AGAFRLRRAASALLL			HLA-B27	19
ARNRPPFGQGY	11	Q92734	Protein TFG (TRK-fused gene protein)	R4(Dimethyl)	385	PNPYARNRPPFGQGY		Yes	HLA-B27	828	Asymmetrical
FRSRGGGGGGFHR	13	P23246	Splicing factor, proline- and glutamine-rich	R4(Dimethyl)	9	SRDRFRSRGGGGGGF		Yes	HLA-B27	144
RRALRQERRK	10	Q8IYS4	Uncharacterized protein C16orf71	R5(Dimethyl)	200	SVNRRALRQERRKMI			HLA-B27	34
RRYRRGYYGR	10	P16989	Y-box-binding protein 3	R5(Dimethyl)	179	ADRRRYRRGYYGRRR			HLA-B27	10
GRFGSRGGPGGGF	13	Q12905	Interleukin enhancer-binding factor 2	R6(Dimethyl)	16	RGGRFGSRGGPGGGF		Yes	HLA-B27	51	Asymmetrical
KRWEMDRGRGR	11	Q9NQ55	Suppressor of SWI4 1 homolog (Ssf-1)	R9(Dimethyl)	428	RWEMDRGRGRLCDQK	Yes		HLA-B27	278	Symmetrical
GERELEAKARP	11	Q8N7F7	Ubiquitin-like protein 4B	R10(Dimethyl)	157	RELEAKARPQSSCDM			N/A		Asymmetrical
CRSLSAVGR	9	Q76NI1	Protein very KIND	R2(Dimethyl)	198	TSSCRVCRSLSAVGR			N/A
AARALAAAR	9	Q99501	GAS2-like protein 1 (GAS2-related protein on chromosome)	R3(Dimethyl)	74	NAVTEAARALAAARP			N/A		Asymmetrical
TSRPPTPTL	9	Q6ZRS2	Helicase SRCAP	R3(Dimethyl)	1098	GVLSGTSRPPTPTLS			N/A
FRSRGGGGGGFH	12	P23246	Splicing factor, proline- and glutamine-rich	R4(Dimethyl)	9	SRDRFRSRGGGGGGF		Yes	N/A
RNSRLAVQLR	10	Q9BY76	Angiopoietin-related protein 4 (Angiopoietin-like protein 4)	R4(Dimethyl)	272	ITGDRNSRLAVQLRD			N/A
YSAGKRGGFNTF	12	P17844	Probable ATP-dependent RNA helicase DDX5	R6(Dimethyl)	502	DRYSAGKRGGFNTFR		Yes	N/A		Symmetrical
YGYNQRPPYGYY	12	Q9BTL3	RNMT-activating mini protein (RAM)	R6(Dimethyl)	112	GHYGYNQRPPYGYY_	Yes		N/A
VRQVSPGPRP	10	Q5VV67	Peroxisome proliferator-activated receptor gamma coactivator-related protein 1	R9(Dimethyl)	373	RQVSPGPRPVLLDDS			N/A		Symmetrical
RTRLAAWAR	9	Q9UNF1	Melanoma-associated antigen D2	R9(Dimethyl)	239	TRLAAWARRALLSLR			N/A

## Sheet: All Unique multiple isoforms
Supplementary Table 1. List of identified peptides harboring multiple modifications.
Sequence	Length	Protein Group Accessions	Protein Description	Modifications	PTM position in protein	PhosphoSitePlus Match	HLA predicted allele	IC50
FPRGRGRFMF	10	Q9Y2W1	Thyroid hormone receptor-associated protein 3	R3(Dimethyl); R5(Dimethyl); R7(Dimethyl)	906, 908, 910	No, Yes, Yes	HLA-B07	15
GPRPKGPRF	9	P49750	YLP motif-containing protein 1	R3(Dimethyl); R8(Dimethyl)	584, 589	No , Yes	HLA-B07	20
GPRPTLRHL	9	Q13310	Polyadenylate-binding protein 4 (PABP-4) (Poly(A)-binding protein 4)	R3(Dimethyl); R7(Dimethyl)	459, 463	Yes, Yes	HLA-B07	14
PAAGAGRGGAR	11	Q9Y6U7	RING finger protein 215	R7(Dimethyl); R11(Dimethyl)	54, 58		N/A
RETSRENKRSQ	11	Q99590	Protein SCAF11	R5(Methyl); R9(Methyl)	489, 493		N/A
RPAAPRPPF	9	P11940	Polyadenylate-binding protein 1 (PABP-1) (Poly(A)-binding protein 1)	R1(Dimethyl); R6(Dimethyl)	455, 460	Yes, Yes	HLA-B07	9
RPAAPRPPFSTM	12	P11940	Polyadenylate-binding protein 1 (PABP-1) (Poly(A)-binding protein 1)	R1(Dimethyl); R6(Dimethyl)	455, 460	Yes, Yes	HLA-B07	8
RPGLRPTGL	9	Q15596	NCOA2	R1(Dimethyl); R5(Dimethyl)	1173, 1177		HLA-B07	18
RPIRGRGGL	9	Q8NC51	Plasminogen activator inhibitor 1 RNA-binding protein	R4(Dimethyl); R6(Dimethyl)	164, 166	Yes, No	HLA-B07	7
RPLRGAKTL	9	Q8WWM7	Ataxin-2-like protein	R1(Methyl); R4(Dimethyl)	414, 417		HLA-B07	12
RPRFSATRTGL	11	Q9H987	Synaptopodin 2-like protein	R1(Dimethyl); R3(Dimethyl)	955, 957		HLA-B07	8
RPRIPSPIGF	10	Q9NRA8	Eukaryotic translation initiation factor 4E transporter	R1(Dimethyl); R3(Dimethyl)	582, 584		HLA-B07	27
RPRTNTPKQL	10	Q9Y6Q9	Nuclear receptor coactivator 3 (NCoA-3)	R1(Methyl); R3(Dimethyl)	1161, 1163		HLA-B07	20
RPRTNTPKQL	10	Q9Y6Q9	NCOA3	R1(Dimethyl); R3(Dimethyl)	1161, 1163		HLA-B07	20
RRRFQSIRR	9	Q9NQX4	Unconventional myosin-Vc	R3(Methyl); R8(Methyl); R9(Dimethyl)	874, 879, 880		HLA-B27	88
RRRSLSPLGGR	11	Q14004	Cyclin-dependent kinase 13	R3(Methyl); R11(Methyl)	314, 322		HLA-B27	109
RTYGGSYGGRGRGR	14	P51116	Fragile X mental retardation syndrome-related protein 2	R10(Dimethyl); R12(Dimethyl)	432, 434		N/A
SPRFPGGPRPTL	12	Q9BWG4	Single-stranded DNA-binding protein 4	R3(Dimethyl); R9(Dimethyl)	151, 157		HLA-B07	7
SPRFPGGPRPTL	12	Q9BWG4	Single-stranded DNA-binding protein 4	R3(Methyl); R9(Dimethyl)	151, 157		HLA-B07	7
SPRYPGGPRPPL	12	P81877	Single-stranded DNA-binding protein 2 (Sequence-specific single-stranded-DNA-binding protein 2)	R3(Dimethyl); R9(Dimethyl)	130, 136		HLA-B07	7
